# Supplementary material for: Resultant equations for training load monitoring during a standard microcycle in sub-elite youth football: a principal components approach
Source: PeerJ. 2023 Aug 4;11:e15806. doi: 10.7717/peerj.15806 (PMC10405799; doi:10.7717/peerj.15806)
Supplement: Supplemental Information 1 — The individual data of the variables selected for this study. [file peerj-11-15806-s001.xls]

## Sheet: PeerJ_dataverse_ipb
ID	Age	Height	Weight	BMI	Sitting_Height	OFFSET	APHV	TD	HSRr	HMLD	AvS	SPR	SPR_D	SPR_N	DSL	ACC	DEC	Percent_HR	HRmax	AvHR	TRIMP	TQR	sRPE
10	13	1.57	45	18.2563	70	-1.851	15.94	5942.2	0	350	28	5.4	0	0	114	32	16	78	189	144	98.4	19	990
10	13	1.57	45	18.2563	70	-1.851	15.94	5277.8	75	517	52	7.2	32	2	276	31	43	76	189	141	81.7	16	1080
10	13	1.57	45	18.2563	70	-1.851	15.94	2810.6	0	95	25	4.8	0	0	163	18	25	77	182	143	119.8	14	1170
10	13	1.57	45	18.2563	70	-1.851	15.94	5578.7	68	441	51	7.8	54	3	154	32	22	79	176	147	127.5	18	1440
10	13	1.57	45	18.2563	70	-1.851	15.94	5602.1	108	488	72	7.5	82	5	108	22	20	78	174	144	127.5	19	1170
1	13	1.55	40.3	16.7742	80	-0.748	14.6	6281.6	6	449	31	5.7	0	0	290	37	34	74	176	137	158.4	16	1080
1	15	1.79	61.4	19.1629	80	-0.748	14.6	3483.7	156	449	51	7.7	137	5	174	25	19	77	184	142	130.4	16	1170
1	13	1.55	40.3	16.7742	80	-0.748	14.6	5225.5	18	537	31	6.2	0	0	297	49	38	77	196	142	100.8	17	1080
1	13	1.55	40.3	16.7742	80	-0.748	14.6	4685.6	3	259	46	5.8	0	0	187	14	16	77	195	143	96.7	15	1170
1	13	1.55	40.3	16.7742	80	-0.748	14.6	6541.1	156	863	85	7.7	93	5	284	31	46	84	200	155	133	16	1080
5	13	1.77	66	21.0667	80	-0.552	14.32	7956.7	9	622	40	6.2	0	0	158	27	28	65	164	121	19.3	17	1080
5	13	1.77	66	21.0667	80	-0.552	14.32	5027.4	181	883	67	7.4	91	6	277	39	69	66	164	122	46	17	1350
5	13	1.77	66	21.0667	80	-0.552	14.32	2899.8	0	128	25	4.6	0	0	157	38	34	77	188	142	89.4	16	1350
5	13	1.77	66	21.0667	80	-0.552	14.32	4829.8	36	385	47	6.3	0	0	202	16	13	77	182	143	71.2	20	1350
5	13	1.77	66	21.0667	80	-0.552	14.32	5351.5	146	726	71	7.7	42	2	288	27	34	69	191	127	52	18	1260
6	13	1.63	54.4	20.475	80	-0.993	13.92	5127.2	1	180	25	5.8	0	0	137	32	18	79	193	146	70.1	15	990
6	13	1.63	54.4	20.475	80	-0.993	13.92	3728.1	29	264	53	7.2	23	1	130	13	12	86	207	160	80.3	15	990
6	13	1.63	54.4	20.475	80	-0.993	13.92	4803.7	19	389	43	6	0	0	205	37	27	78	198	145	81.6	15	1350
6	15	1.75	69.7	22.7592	80	-0.993	13.92	6488	116	917	56	7.1	62	7	582	78	79	87	207	161	126.5	16	1350
6	13	1.63	54.4	20.475	80	-0.993	13.92	5496.7	46	368	60	7.3	26	2	398	25	16	77	180	134	43.5	14	1260
6	13	1.63	54.4	20.475	80	-0.993	13.92	5876.4	211	910	81	7.6	177	9	290	25	20	77	180	134	56	18	1260
14	13	1.75	62	20.2449	80	-0.608	14.34	7741.3	199	812	35	7.5	96	8	387	63	56	65	164	121	19.3	16	1080
14	13	1.75	62	20.2449	80	-0.608	14.34	5436	55	758	45	7.3	14	2	391	70	61	66	164	122	46	16	1080
14	13	1.75	62	20.2449	80	-0.608	14.34	1838.1	8	127	23	6.1	0	0	80	19	18	77	188	142	89.4	18	1080
14	13	1.75	62	20.2449	80	-0.608	14.34	4027.6	38	387	39	6.3	19	2	135	42	22	77	182	143	71.2	20	1530
14	13	1.75	62	20.2449	80	-0.608	14.34	5285.6	88	574	55	6.9	38	3	251	42	36	69	191	127	52	16	1350
14	13	1.75	62	20.2449	80	-0.608	14.34	6225.7	60	677	83	6.7	15	1	174	16	26	64	163	118	32.2	17	1620
19	13	1.69	53.4	18.6968	70	-1.978	15.66	7550	13	722	32	6	0	0	282	70	70	79	177	146	149.1	13	1440
19	13	1.69	53.4	18.6968	70	-1.978	15.66	4611.5	132	560	58	7.4	96	7	368	37	32	77	187	143	80.9	19	1440
19	13	1.69	53.4	18.6968	70	-1.978	15.66	5849.2	59	667	49	7.4	27	2	460	62	52	75	180	138	96.3	17	1260
19	13	1.69	53.4	18.6968	70	-1.978	15.66	6163.6	44	805	66	6.3	0	0	178	69	59	82	188	151	82.9	16	1440
19	13	1.69	53.4	18.6968	70	-1.978	15.66	3334.4	12	337	64	6.3	0	0	183	19	15	74	185	136	105	14	1260
2	13	1.67	54	19.3625	80	-0.823	14.2	6309.6	0	322	31	4.8	0	0	206	30	23	72	171	134	94.5	14	990
2	13	1.67	54	19.3625	80	-0.823	14.2	4002.6	60	221	46	6.1	0	0	205	7	8	78	187	145	91.8	17	1170
2	13	1.67	54	19.3625	80	-0.823	14.2	3988.3	9	251	39	6.4	9	1	201	30	27	78	182	145	130.7	17	1350
2	13	1.67	54	19.3625	80	-0.823	14.2	4685.6	3	259	46	5.8	0	0	187	14	16	86	201	160	122.6	15	1170
2	13	1.67	54	19.3625	80	-0.823	14.2	6811.8	248	1143	61	8.4	194	12	338	90	122	81	196	149	107.4	14	1260
2	13	1.67	54	19.3625	80	-0.823	14.2	6746.2	195	908	88	7	126	7	623	33	32	76	179	140	81.4	20	1080
12	13	1.7	47.6	16.4706	80	-0.871	14.3	7299.9	1	420	33	7.2	0	0	668	25	46	75	183	138	75.8	16	1080
12	13	1.7	47.6	16.4706	80	-0.871	14.3	1480.7	0	34	16	4.3	0	0	111	25	17	71	199	132	42.4	16	1350
12	13	1.7	47.6	16.4706	80	-0.871	14.3	5171.9	3	330	53	6	0	0	119	14	17	81	188	150	79.4	15	1260
12	13	1.7	47.6	16.4706	80	-0.871	14.3	5121.7	26	420	68	6.2	0	0	154	16	11	75	184	138	62.8	19	1080
13	13	1.7	67.7	23.4256	80	-0.665	14.02	7997.4	10	684	36	6	0	0	416	40	44	78	182	144	79.8	15	1170
13	13	1.7	67.7	23.4256	80	-0.665	14.02	4081.4	70	427	58	6.5	44	3	305	20	23	68	196	125	39.2	15	1170
13	13	1.7	67.7	23.4256	80	-0.665	14.02	4985.5	20	451	43	6.8	11	1	198	44	33	74	193	136	86.5	16	810
13	13	1.7	67.7	23.4256	80	-0.665	14.02	5377.3	5	317	56	5	0	0	141	22	23	64	176	118	36.8	18	1530
13	13	1.7	67.7	23.4256	80	-0.665	14.02	5936.4	10	369	74	6.1	0	0	142	10	12	65	178	121	43.1	18	1350
15	13	1.73	63	21.0498	80	-0.767	14.06	7865.1	6	534	35	5.8	0	0	191	40	32	82	191	151	151	14	1170
15	13	1.73	63	21.0498	80	-0.767	14.06	4338.6	88	448	50	7.8	81	5	153	23	17	76	189	141	141	16	1350
15	13	1.73	63	21.0498	80	-0.767	14.06	5121.8	68	507	42	7.6	20	1	459	59	45	71	180	132	132	16	1350
15	13	1.73	63	21.0498	80	-0.767	14.06	5459.3	26	307	59	6.5	0	0	255	21	19	73	177	135	135	18	1260
15	13	1.73	63	21.0498	80	-0.767	14.06	5878	58	599	73	6.9	10	2	347	21	23	77	185	143	143	20	1350
7	13	1.74	62.5	20.6434	80	-0.46	14.51	6420.8	2	388	32	5.7	0	0	111	33	18	71	186	131	81.7	16	1080
7	13	1.74	62.5	20.6434	80	-0.46	14.51	4694	129	635	77	7.5	77	4	95	19	17	72	200	133	50.3	18	1080
7	13	1.74	62.5	20.6434	80	-0.46	14.51	5611.2	119	791	66	7.2	88	5	466	31	47	76	172	141	137.3	16	1350
7	13	1.74	62.5	20.6434	80	-0.46	14.51	6427.1	22	622	58	6.3	9	1	574	40	31	72	176	133	103.2	20	1170
7	13	1.74	62.5	20.6434	80	-0.46	14.51	5796.9	34	502	71	6.8	14	1	239	14	14	75	181	138	82.7	14	1170
9	13	1.61	51.6	19.9066	90	0.108	12.84	7237.5	4	317	34	6	0	0	146	22	13	76	179	141	138.3	19	990
9	13	1.61	51.6	19.9066	90	0.108	12.84	4281.2	30	243	51	7.1	25	2	72	18	16	71	179	131	70.9	19	1350
9	13	1.61	51.6	19.9066	90	0.108	12.84	4492.5	12	408	41	6.2	0	0	488	36	43	84	203	155	82.5	14	1170
9	13	1.61	51.6	19.9066	90	0.108	12.84	5403.6	62	653	52	7.3	33	2	151	48	47	70	171	130	101.6	17	1170
9	13	1.61	51.6	19.9066	90	0.108	12.84	6096.8	91	886	82	6.8	30	2	375	56	43	81	192	150	120.7	18	1530
16	14	1.67	42.5	15.239	80	-0.459	15.04	7658.3	7	396	33	5.9	0	0	186	43	19	75	177	139	106.3	11	990
16	14	1.67	42.5	15.239	80	-0.459	15.04	3320.1	2	224	49	5.6	0	0	144	13	13	72	182	134	102.4	15	1440
16	14	1.67	42.5	15.239	80	-0.459	15.04	6001.3	117	1024	49	6.7	50	4	324	106	101	74	177	136	110.8	11	1350
16	14	1.67	42.5	15.239	80	-0.459	15.04	6273.3	2	418	60	6	0	0	133	29	14	77	191	143	93.4	16	1350
16	14	1.67	42.5	15.239	80	-0.459	15.04	5166.1	89	422	65	7.5	67	4	112	18	9	78	189	145	81.9	17	1260
17	13	1.58	44.9	17.9859	90	0.42	13.28	6963.2	80	637	31	6.8	42	5	290	44	44	79	183	147	146.6	13	1170
17	13	1.58	44.9	17.9859	90	0.42	13.28	4325.8	137	744	48	6.7	57	6	114	58	37	81	191	150	99.6	13	1170
17	13	1.58	44.9	17.9859	90	0.42	13.28	4444.9	35	391	52	6.4	22	2	296	29	13	78	187	144	79.3	16	1350
17	13	1.58	44.9	17.9859	90	0.42	13.28	4328.9	0	181	35	5.5	0	0	149	28	16	81	197	149	100.9	15	1260
17	13	1.58	44.9	17.9859	90	0.42	13.28	6039.5	60	528	62	6.4	8	1	152	34	19	77	177	142	152.1	17	1350
17	13	1.58	44.9	17.9859	90	0.42	13.28	6308.6	82	680	76	6.9	21	2	729	24	41	77	186	143	93.6	15	1170
18	13	1.65	48.2	17.7043	90	0.449	13.25	7477	7	552	33	6.1	0	0	161	48	38	69	171	128	61.9	14	1260
18	13	1.65	48.2	17.7043	90	0.449	13.25	3564.3	0	159	41	5.5	0	0	83	27	28	74	194	137	69.7	17	990
18	13	1.65	48.2	17.7043	90	0.449	13.25	4469	16	329	40	7.2	13	1	123	52	17	84	196	155	143.9	16	1350
18	13	1.65	48.2	17.7043	90	0.449	13.25	4273.1	55	442	43	6.9	25	2	410	29	43	71	179	131	90.1	17	1440
18	13	1.65	48.2	17.7043	90	0.449	13.25	4355.4	17	295	56	6.5	0	0	277	18	7	79	194	146	122.3	20	1170
20	14	1.8	67.9	20.9568	80	-0.245	14.75	7741.4	6	531	31	5.9	0	0	364	62	21	78	188	144	122.2	15	1170
20	14	1.8	67.9	20.9568	80	-0.245	14.75	4739.4	131	700	54	7.7	61	4	297	32	48	84	197	155	168.3	16	900
20	14	1.8	67.9	20.9568	80	-0.245	14.75	3518.4	21	280	33	6.2	0	0	120	28	9	75	192	139	71.3	17	1440
20	14	1.8	67.9	20.9568	80	-0.245	14.75	5350.8	36	621	51	6.4	8	1	223	35	48	81	202	149	78.6	16	1440
20	14	1.8	67.9	20.9568	80	-0.245	14.75	5153.7	128	543	68	7.1	68	3	126	17	16	81	202	149	78.6	19	1260
3	13	1.73	57.4	19.1787	90	0.33	12.94	5791.7	0	152	29	5	0	0	74	11	9	72	180	143	128.4	17	990
3	13	1.73	57.4	19.1787	90	0.33	12.94	3879.5	16	146	42	6.3	10	1	144	11	4	75	189	143	91.8	17	990
3	13	1.73	57.4	19.1787	90	0.33	12.94	3744.2	0	166	34	5.5	0	0	126	22	14	79	182	142	122.7	20	1620
3	13	1.73	57.4	19.1787	90	0.33	12.94	5175.5	29	603	54	7.3	0	0	268	61	46	61	170	135	72.8	16	1440
3	13	1.73	57.4	19.1787	90	0.33	12.94	5856.9	231	787	82	8.7	190	9	242	34	34	64	202	156	77.4	15	1260
11	14	1.78	59.1	18.6529	80	-0.42	14.74	7654.1	19	656	34	6.8	7	1	376	49	68	79	186	146	92.2	18	990
11	14	1.78	59.1	18.6529	80	-0.42	14.74	3996.4	29	384	45	6.8	34	2	278	15	11	78	185	145	84.1	17	1080
11	14	1.78	59.1	18.6529	80	-0.42	14.74	5176.7	38	630	43	7.5	35	2	286	84	42	74	180	137	87.4	15	1260
11	14	1.78	59.1	18.6529	80	-0.42	14.74	6007.3	72	683	62	6.8	25	1	315	40	29	74	182	136	87.1	18	1440
11	14	1.78	59.1	18.6529	80	-0.42	14.74	4934.4	91	480	72	7.2	58	2	163	22	18	76	189	141	50.4	16	1350
4	14	1.85	73	21.3294	90	1.206	13.49	6864.6	41	493	34	6.8	28	2	279	32	39	76	182	144	79.8	17	810
4	14	1.85	73	21.3294	90	1.206	13.49	4779.6	14	370	52	6	0	0	289	25	13	75	196	125	39.2	18	1080
4	14	1.85	73	21.3294	90	1.206	13.49	4198.7	13	347	34	6.4	9	1	154	48	28	71	193	136	86.5	16	1530
4	14	1.85	73	21.3294	90	1.206	13.49	5238	75	354	52	7	57	4	306	15	15	81	176	118	36.8	15	1350
4	14	1.85	73	21.3294	90	1.206	13.49	4388.7	36	406	57	6.5	14	1	137	25	20	75	178	121	43.1	20	1440
8	14	1.64	43	15.9875	90	0.681	13.59	7939.5	13	445	39	6.4	8	1	328	14	30	78	188	144	122.2	15	1080
8	14	1.64	43	15.9875	90	0.681	13.59	2639.3	10	147	31	6.1	0	0	100	7	14	84	197	155	168.3	16	1350
8	14	1.64	43	15.9875	90	0.681	13.59	5092.1	46	571	50	7.7	24	2	441	50	43	75	192	139	71.3	15	1440
8	14	1.64	43	15.9875	90	0.681	13.59	5222.3	125	930	80	6.9	33	4	200	32	54	81	202	149	78.6	15	1260
17	15	1.685	63.7	22.4357	80	0.063	15.1	9243.7	100	1024	41	7.2	45	4	445	76	69	70	185	130	88.9	18	1080
17	15	1.685	63.7	22.4357	80	0.063	15.1	7233.8	248	1196	146	14.4	146	13	197	76	57	83	195	154	119	15	1620
17	15	1.685	63.7	22.4357	80	0.063	15.1	6725.8	126	880	53	7.1	78	1	327	64	51	62	179	115	56.5	16	1260
17	15	1.685	63.7	22.4357	80	0.063	15.1	3715.6	18	454	50	6.6	16	1	259	42	48	74	193	136	40.2	14	1260
17	15	1.685	63.7	22.4357	80	0.063	15.1	4152.6	29	301	35	6.8	14	2	150	50	44	80	194	148	102.2	16	1260
10	15	1.79	62.5	19.5063	80	-0.006	15.34	9556.3	371	1492	45	8.3	264	18	325	64	89	68	184	125	63.5	15	1260
10	15	1.79	62.5	19.5063	80	-0.006	15.34	4744.8	114	614	192	15.3	67	4	278	39	32	76	196	140	91.8	13	1170
10	15	1.79	62.5	19.5063	80	-0.006	15.34	7258.9	76	832	55	6.5	25	3	267	79	50	74	185	137	110.3	17	1170
10	15	1.79	62.5	19.5063	80	-0.006	15.34	6278.5	75	756	52	6.6	31	3	189	70	57	68	178	125	59.2	14	1260
10	15	1.79	62.5	19.5063	80	-0.006	15.34	5158	45	495	44	6.6	21	2	312	53	40	75	189	138	104.1	17	1170
2	15	1.7	54.3	18.7889	100	2.47	12.53	5901.5	218	995	31	7.7	159	12	272	56	75	82	199	152	129.1	15	1260
2	15	1.7	54.3	18.7889	100	2.47	12.53	8029	329	335	63	12	231	15	72	32	24	78	190	144	85.6	18	1080
2	15	1.7	54.3	18.7889	100	2.47	12.53	7397.1	79	1138	63	6.6	29	3	459	96	104	78	190	144	86.1	17	900
4	15	1.8	62.1	19.1667	100	3.236	12.93	3307	0	137	27	4.6	0	0	124	57	56	77	187	142	71.9	16	1260
4	15	1.8	62.1	19.1667	100	3.236	12.93	4120	28	132	17	4.1	0	0	123	43	46	65	184	120	43.2	16	900
4	15	1.8	62.1	19.1667	100	3.236	12.93	6769.4	48	614	52	7	13	1	195	29	39	63	181	117	39	16	1080
4	15	1.8	62.1	19.1667	100	3.236	12.93	5728	54	638	52	6.9	37	3	99	76	60	71	186	132	81	18	1170
4	15	1.8	62.1	19.1667	100	3.236	12.93	5230.9	227	626	41	7.8	203	9	209	58	43	71	193	132	79.5	16	1350
9	15	1.7	47.3	16.3668	90	1.119	13.92	6928.6	52	657	36	6.7	38	3	273	45	33	64	167	119	78.9	15	1350
9	15	1.7	47.3	16.3668	90	1.119	13.92	5290	48	568	51	7.6	23	2	414	53	46	66	171	122	85.2	18	1170
9	15	1.7	47.3	16.3668	90	1.119	13.92	7272.3	54	995	55	6.4	6	1	234	48	70	66	173	123	120.9	19	1080
9	15	1.7	47.3	16.3668	90	1.119	13.92	6256.3	72	776	50	7.3	44	4	416	78	67	74	190	137	111.3	14	1260
9	15	1.7	47.3	16.3668	90	1.119	13.92	3920.1	89	322	34	8.6	63	2	193	53	32	74	190	137	85.2	16	1440
8	15	1.76	59.5	19.2084	90	1.65	14.18	6711.5	53	663	41	7.1	12	1	232	50	55	79	201	147	80.2	15	1080
8	15	1.76	59.5	19.2084	90	1.65	14.18	3422.4	81	513	81	7.5	44	4	102	22	20	79	201	147	166.7	15	810
8	15	1.76	59.5	19.2084	90	1.65	14.18	5830.9	18	516	49	6.2	0	0	125	56	30	71	190	131	72.6	18	1440
8	15	1.76	59.5	19.2084	90	1.65	14.18	4497.1	3	393	40	6	0	0	127	48	25	65	167	121	124.2	20	1170
8	15	1.76	59.5	19.2084	90	1.65	14.18	5856.5	52	717	55	6.7	27	2	358	76	69	79	193	146	70.1	17	1350
8	15	1.76	59.5	19.2084	90	1.65	14.18	4825.5	12	330	41	6.3	0	0	180	54	35	86	207	160	80.3	13	1260
15	15	1.7	59.7	20.6574	90	1.751	14.19	9296.1	258	1306	45	7.7	164	14	629	66	60	73	180	135	87.3	15	1080
15	15	1.7	59.7	20.6574	90	1.751	14.19	5789	48	487	64	6.9	10	1	328	31	26	69	189	128	76.8	16	1170
15	15	1.7	59.7	20.6574	90	1.751	14.19	6747.2	111	896	50	7.7	72	6	388	68	57	69	189	128	76.8	16	1260
15	15	1.7	59.7	20.6574	90	1.751	14.19	5597.2	18	475	53	6.5	7	1	201	79	61	76	188	140	92.7	15	1440
15	15	1.7	59.7	20.6574	90	1.751	14.19	4891.2	22	424	42	6.7	5	1	106	42	40	75	187	138	82.4	16	1440
1	15	1.79	61.4	19.1629	100	2.92	12.72	7021.3	125	802	37	7.9	72	5	343	22	38	75	200	138	85.5	14	1080
1	15	1.79	61.4	19.1629	100	2.92	12.72	7777.6	326	323	54	12	228	14	59	27	19	72	188	133	75.5	15	1080
1	15	1.79	61.4	19.1629	100	2.92	12.72	3616.1	6.5	2	169	31	0	0	117	37	30	72	188	133	75.5	16	1260
1	15	1.79	61.4	19.1629	100	2.92	12.72	7397.1	79	1138	63	6.6	29	3	459	96	204	68	178	126	59	15	1080
1	15	1.79	61.4	19.1629	100	2.92	12.72	6596.6	399	1097	50	7.8	214	20	286	84	73	88	204	162	130.9	16	1260
3	15	1.73	60.9	20.3482	100	2.942	12.71	5561.3	41	511	30	7.3	19	2	120	34	22	71	187	132	81.8	15	1260
3	15	1.73	60.9	20.3482	100	2.942	12.71	1546.7	4	249	37	5.6	0	0	167	13	17	77	197	142	131.1	14	990
3	15	1.73	60.9	20.3482	100	2.942	12.71	7605.5	195	1214	60	7.1	93	10	363	86	70	69	180	128	97.4	18	1170
3	17	1.71	56	19.1512	100	2.942	12.71	1555.7	83	311	25	7.8	65	5	259	20	15	74	190	136	91.2	19	1170
3	15	1.73	60.9	20.3482	100	2.942	12.71	4939.3	0	215	93	9.1	0	0	213	70	58	74	190	137	96.1	16	1260
3	15	1.73	60.9	20.3482	100	2.942	12.71	6414.3	372	1022	54	8.5	254	16	250	56	63	70	177	129	104	20	1170
5	16	1.8	70.3	21.6975	100	3.657	13.05	7615.9	118	752	42	7.7	79	7	270	55	49	63	178	116	48.2	15	1260
5	16	1.8	70.3	21.6975	100	3.657	13.05	3489.23	23	413	55	6.4	16	2	127	24	19	66	181	122	55.7	16	900
5	16	1.8	70.3	21.6975	100	3.657	13.05	7281.3	58	638	59	6.6	28	2	403	28	38	81	197	149	146.6	18	1260
5	16	1.8	70.3	21.6975	100	3.657	13.05	6756	171	926	53	7.6	109	10	321	91	91	83	197	154	166.7	17	1350
5	16	1.8	70.3	21.6975	100	3.657	13.05	6145.9	286	769	51	8.5	254	15	357	69	50	85	201	158	154.5	16	1440
6	15	1.75	69.7	22.7592	100	2.977	12.55	8161.5	146	1116	39	7.4	74	7	491	80	58	83	195	153	155.8	16	990
6	15	1.75	69.7	22.7592	100	2.977	12.55	4672	24	381	54	6.3	11	3	191	37	31	78	198	145	145.7	14	1260
6	15	1.75	69.7	22.7592	100	2.977	12.55	6401.6	53	590	52	7	19	2	163	38	31	72	192	134	94.3	17	1080
6	15	1.75	69.7	22.7592	100	2.977	12.55	4613.7	23	379	44	6.1	12	2	189	35	28	67	174	124	116.2	18	1260
7	15	1.73	60.9	20.3482	100	2.845	12.64	5458	33	557	56	6.7	34	2	309	58	45	74	189	137	111.7	17	1170
7	15	1.73	60.9	20.3482	100	2.845	12.64	6446.8	40	791	50	6.5	11	1	375	67	51	74	198	137	85.9	18	1440
7	15	1.73	60.9	20.3482	100	2.845	12.64	6964.8	21	536	58	6.1	0	0	347	60	48	66	190	123	56.2	16	1350
7	15	1.73	60.9	20.3482	100	2.845	12.64	6635	233	825	52	9.4	194	12	414	65	55	74	181	136	147.3	13	1170
16	16	1.69	58.7	20.5525	80	0.616	15.99	7644.9	66	610	34	7.3	45	3	200	31	36	69	175	128	74.8	15	1080
16	16	1.69	58.7	20.5525	80	0.616	15.99	5866.7	335	1287	102	8.7	234	14	268	44	74	77	201	143	100.2	16	1170
16	16	1.69	58.7	20.5525	80	0.616	15.99	6918.6	74	922	56	6.9	32	3	239	85	95	82	207	152	102.4	19	1440
16	16	1.69	58.7	20.5525	80	0.616	15.99	5182.9	43	384	40	6.9	22	3	146	50	34	71	196	132	36.6	19	1260
18	15	1.79	67	20.9107	100	3.611	13.08	8569.2	167	1092	38	8	101	8	448	62	66	72	194	133	84.6	16	720
18	15	1.79	67	20.9107	100	3.611	13.08	4834.4	97	831	221	13.8	48	4	378	41	47	73	194	135	38	16	1260
18	15	1.79	67	20.9107	100	3.611	13.08	2341.1	20	155	40	6.8	5	1	96	24	9	71	190	132	89.5	20	1260
18	15	1.79	67	20.9107	100	3.611	13.08	5948.9	119	644	46	7.3	79	4	165	56	58	63	190	117	48.7	17	1440
20	16	1.83	76	22.694	86	1.579	14.98	6314.9	65	452	28	7.3	36	3	221	29	38	69	181	128	63.2	12	1350
20	16	1.83	76	22.694	86	1.579	14.98	6256.9	56	334	25	5.7	44	3	227	31	36	75	195	138	61.8	12	1170
20	16	1.83	76	22.694	86	1.579	14.98	7049.7	170	1032	57	7.5	112	10	321	79	57	64	165	119	91.9	14	1260
20	16	1.83	76	22.694	86	1.579	14.98	5321.8	32	559	50	6.7	21	2	271	73	61	71	185	131	52.8	16	1260
20	16	1.83	76	22.694	86	1.579	14.98	3684.3	9	194	31	6	0	0	140	33	27	70	182	130	85.6	16	1440
11	15	1.84	70.5	20.8235	100	2.934	12.56	6903.6	113	716	33	7.5	72	7	439	44	59	69	172	127	103.2	16	1080
11	15	1.84	70.5	20.8235	100	2.934	12.56	5814	66	432	47	7.9	56	3	152	31	29	73	180	135	116.4	16	1350
11	15	1.84	70.5	20.8235	100	2.934	12.56	6370.4	32	621	51	6.4	6	1	161	45	31	74	192	136	104.1	19	1260
11	15	1.84	70.5	20.8235	100	2.934	12.56	6013.3	16	500	49	6.3	0	0	215	61	44	78	194	144	126	17	1260
11	15	1.84	70.5	20.8235	100	2.934	12.56	6405.1	316	823	52	8.3	272	12	540	55	46	72	190	133	82	17	1440
12	16	1.73	72	24.0569	90	2.083	14.23	7380.9	141	971	44	7.2	53	5	267	59	71	70	184	129	89.6	11	1080
12	16	1.73	72	24.0569	90	2.083	14.23	3807	137	749	82	8.1	85	7	264	34	48	70	184	129	89.6	15	1080
12	16	1.73	72	24.0569	90	2.083	14.23	4854.4	88	382	74	7.1	61	3	171	24	25	74	189	136	93.4	17	1080
12	16	1.73	72	24.0569	90	2.083	14.23	8661.4	225	1131	156	15.2	146	10	435	58	73	83	195	153	66.9	17	1080
12	16	1.73	72	24.0569	90	2.083	14.23	6909.7	59	792	55	6.7	33	2	415	47	51	89	206	164	131.9	19	1350
12	16	1.73	72	24.0569	90	2.083	14.23	6265	51	789	57	7.1	40	3	413	86	89	70	182	130	75.3	16	1440
12	16	1.73	72	24.0569	90	2.083	14.23	4056.7	6	209	29	6.6	0	0	143	37	32	72	191	134	81.3	17	1260
13	16	1.82	65	19.6232	90	1.908	14.37	8292.9	226	1013	39	8.5	190	15	318	54	56	72	191	134	55.1	15	990
13	16	1.82	65	19.6232	90	1.908	14.37	4485.5	186	907	96	7.6	106	8	200	30	44	72	193	133	89.7	16	1440
13	16	1.82	65	19.6232	90	1.908	14.37	6535.1	65	413	46	8.2	49	4	222	66	48	78	196	145	79.7	16	1440
13	16	1.82	65	19.6232	90	1.908	14.37	5862.8	42	450	45	6.9	17	2	129	38	25	75	194	138	86.7	20	1080
13	16	1.82	65	19.6232	90	1.908	14.37	6073.9	37	661	53	7.2	13	1	231	70	58	83	204	153	110.3	16	1260
13	16	1.82	65	19.6232	90	1.908	14.37	6323.6	293	856	50	8.3	238	11	322	80	55	70	182	130	103.9	16	1260
14	16	1.775	70.2	22.2813	80	0.544	15.74	7091.2	40	522	32	7.3	16	1	97	45	32	84	204	156	112.4	16	1080
14	16	1.775	70.2	22.2813	80	0.544	15.74	7492	180	1124	141	14.7	98	7	536	84	82	83	201	153	139.8	15	1260
14	16	1.775	70.2	22.2813	80	0.544	15.74	6548.4	116	803	50	8.3	62	3	345	39	53	77	180	143	128.4	18	1350
14	16	1.775	70.2	22.2813	80	0.544	15.74	1249.3	35	38	16	7.2	55	1	0	1	0	77	189	143	91.8	16	1440
14	16	1.775	70.2	22.2813	80	0.544	15.74	5330	167	639	42	8.3	122	7	148	66	51	77	182	142	122.7	16	1170
19	16	1.8	69.1	21.3272	90	2.035	14.37	8150.2	200	930	38	8.2	164	10	233	94	70	72	174	133	167.6	20	900
19	16	1.8	69.1	21.3272	90	2.035	14.37	9831.5	174	1094	144	13.8	121	9	376	77	69	83	192	154	180.9	16	1080
19	16	1.8	69.1	21.3272	90	2.035	14.37	7411.3	170	981	56	7.7	91	9	291	73	50	75	182	139	114.9	16	1080
19	16	1.8	69.1	21.3272	90	2.035	14.37	6639.4	22	729	56	6.6	12	1	318	61	54	72	190	134	42.4	18	1350
19	16	1.8	69.1	21.3272	90	2.035	14.37	5074.3	42	365	43	7	14	2	165	44	31	78	186	144	137.2	19	1260
19	18	1.9	81	22.4377	100	0.003	10.18	4047.1	2	414	38	5.8	0	0	74	45	49	66	182	123	51.2	12	1170
19	18	1.9	81	22.4377	100	0.003	10.18	5542.5	63	648	55	6.7	41	3	328	64	53	72	185	133	90.7	14	1170
19	18	1.9	81	22.4377	100	0.003	10.18	6008.7	262	305	69	7.6	237	6	166	5	13	76	192	141	125.8	11	630
19	18	1.9	81	22.4377	100	0.003	10.18	1552.4	39	97	17	7.1	23	1	49	12	4	77	190	142	99.7	15	1260
19	18	1.9	81	22.4377	100	0.003	10.18	4876.9	51	569	67	7.2	23	2	237	38	43	71	192	132	59.3	17	1170
20	17	1.85	76.5	22.3521	100	-0.077	10.26	5966.1	112	834	40	7	34	3	128	90	74	65	189	121	105	12	1260
20	17	1.85	76.5	22.3521	100	-0.077	10.26	2189.3	1	83	29	5.7	0	0	70	25	22	77	188	143	101.5	17	900
20	17	1.85	76.5	22.3521	100	-0.077	10.26	6794.2	45	763	58	6.6	28	3	323	43	46	77	203	142	71.4	15	1350
20	17	1.85	76.5	22.3521	100	-0.077	10.26	4451.2	67	466	45	6.8	29	2	145	39	18	71	187	131	86.3	15	630
20	17	1.85	76.5	22.3521	100	-0.077	10.26	5076.1	92	647	59	7.4	47	4	180	69	66	64	182	118	56.3	15	1170
19	13	1.69	53.4	18.7	100	0.003	10.18	5749.2	79	687	49	9.4	29	4	510	77	77	69	188	127	64.8	14	1260
20	14	1.8	67.9	20.96	100	-0.077	10.26	3418.4	41	300	33	8.2	2	2	170	43	34	65	173	121	53	19	1260
19	18	1.9	81	22.44	100	0.003	10.18	1632.4	69	127	17	9.1	28	3	69	27	24	68	189	126	60.8	12	1170
20	17	1.85	76.5	22.35	100	-0.077	10.26	4531.2	97	496	45	8.8	34	4	165	54	38	76	181	141	105.3	12	1260
3	17	1.71	56	19.1512	90	2.248	14.77	6596.4	18	595	57	6.2	0	0	624	44	51	77	185	142	75.2	14	900
3	17	1.71	56	19.1512	90	2.248	14.77	2199.5	0	181	22	5.4	0	0	208	63	54	74	186	136	55.6	13	990
3	17	1.71	56	19.1512	90	2.248	14.77	7253.3	245	1127	70	8.6	173	11	320	66	71	74	193	136	66.3	17	630
3	17	1.71	56	19.1512	90	2.248	14.77	2249.6	0	121	27	5.4	0	0	122	42	33	66	186	122	45.8	14	1440
7	17	1.8	75.7	23.3642	80	0.548	15.64	7393.2	118	910	64	6.4	18	2	438	40	52	71	185	131	76.6	19	810
7	17	1.8	75.7	23.3642	80	0.548	15.64	5447.8	31	569	53	6.8	24	1	319	60	47	69	188	128	81.3	17	1440
7	17	1.8	75.7	23.3642	80	0.548	15.64	6917.7	59	687	67	7	27	2	334	44	38	74	185	136	81.8	15	1260
7	17	1.8	75.7	23.3642	80	0.548	15.64	3701.4	223	535	39	8.2	168	8	150	37	13	74	185	136	81.8	19	810
7	17	1.8	75.7	23.3642	80	0.548	15.64	5179.8	18	386	50	6.2	6	1	233	17	26	69	189	127	76.3	14	1080
8	17	1.75	72.6	23.7061	90	2.52	14.67	4776.2	8	352	41	5.9	0	0	168	41	24	75	186	138	56.5	15	630
8	17	1.75	72.6	23.7061	90	2.52	14.67	6213.1	90	575	60	7.1	56	5	147	33	31	75	186	138	56.5	15	1260
8	17	1.75	72.6	23.7061	90	2.52	14.67	3412.3	15	260	32	6.7	0	0	100	26	16	82	197	152	120.3	14	1170
8	17	1.75	72.6	23.7061	90	2.52	14.67	5315.7	76	720	61	6.9	30	3	188	52	57	77	193	142	88.6	14	1170
9	17	1.65	56.9	20.8999	80	1.288	16.82	6479	77	873	57	7.7	34	3	317	43	52	71	177	132	88.6	11	900
9	17	1.65	56.9	20.8999	80	1.288	16.82	7506.1	201	1106	73	7.5	125	10	328	59	61	73	200	135	30.6	15	1170
9	17	1.65	56.9	20.8999	80	1.288	16.82	1618.1	22	120	17	6.7	14	1	136	13	4	73	200	135	30.6	11	900
9	17	1.65	56.9	20.8999	80	1.288	16.82	5553	46	737	67	6.3	14	2	186	61	39	60	157	111	52.2	17	1170
11	18	1.69	66.3	23.2135	90	3.013	15.18	6049.8	24	717	58	6.2	0	0	514	49	52	74	200	136	33.9	13	990
11	18	1.69	66.3	23.2135	90	3.013	15.18	7199.8	217	1256	71	8.6	154	10	424	65	94	74	200	136	33.9	14	1260
11	18	1.69	66.3	23.2135	90	3.013	15.18	3768.8	0	271	37	5.2	0	0	98	34	5	67	157	124	89.8	13	630
11	18	1.69	66.3	23.2135	90	3.013	15.18	5007.5	138	677	57	8.1	82	1	175	62	56	67	157	124	89.8	17	1080
3	13	1.73	57.4	19.18	90	2.248	14.77	3644.2	20	186	34	7.5	2	2	176	37	39	70	181	129	77.3	15	1260
7	13	1.74	62.5	20.64	80	0.548	15.64	6327.1	42	642	58	8.3	11	3	624	55	56	78	187	145	93.8	14	1170
8	14	1.64	43	15.99	90	2.52	14.67	4397.1	23	413	40	8	2	2	177	63	50	69	182	127	57.9	15	1260
9	13	1.61	51.6	19.91	80	1.288	16.82	4392.5	32	428	41	8.2	2	2	538	51	68	70	180	130	68.4	18	1530
11	14	1.78	59.1	18.65	90	3.013	15.18	5076.7	58	650	43	9.5	37	4	336	99	67	75	189	138	100.8	16	1350
3	17	1.71	56	19.15	90	2.248	14.77	1635.7	113	341	25	9.8	70	7	279	35	35	75	188	138	98.6	14	900
7	17	1.8	75.7	23.36	80	0.548	15.64	3781.4	253	565	39	10.2	173	10	170	52	33	73	186	135	63.9	19	810
8	17	1.75	72.6	23.71	90	2.52	14.67	3492.3	45	290	32	8.7	5	2	120	41	36	64	164	118	79.7	15	630
9	17	1.65	56.9	20.9	80	1.288	16.82	1698.1	52	150	17	8.7	19	3	156	28	24	79	196	147	90.8	11	900
11	18	1.69	66.3	23.21	90	3.013	15.18	3848.8	30	301	37	7.2	5	2	118	49	25	58	179	108	36.5	13	990
5	18	1.77	76.2	24.3225	100	5.021	13.82	5278.7	3	335	43	5.6	0	0	117	32	29	77	191	142	83.4	15	630
5	18	1.77	76.2	24.3225	100	5.021	13.82	5826.2	99	898	60	7.7	80	5	471	85	83	68	176	125	72.4	16	1350
5	18	1.77	76.2	24.3225	100	5.021	13.82	3064.7	29	288	32	6.5	14	2	302	21	13	81	187	149	103.8	15	630
10	17	1.75	66.8	21.8122	90	2.732	15.02	5229.5	138	591	51	7	146	1	192	36	40	75	189	139	81.1	15	1170
10	17	1.75	66.8	21.8122	90	2.732	15.02	6748.4	94	719	66	7.4	63	4	222	50	22	75	185	139	74.8	14	1170
10	17	1.75	66.8	21.8122	90	2.732	15.02	3214.2	4	246	30	5.9	0	0	82	35	10	79	187	147	103.8	15	1350
10	17	1.75	66.8	21.8122	90	2.732	15.02	5436.9	40	515	58	7.7	23	2	184	66	56	81	187	150	100	15	1260
12	18	1.85	77.4	22.615	100	4.402	13.48	6068.3	24	632	57	6.3	0	0	80	35	38	77	190	143	129.4	13	1080
12	18	1.85	77.4	22.615	100	4.402	13.48	6592.3	96	849	66	8.6	55	1	417	94	50	77	190	143	126.9	17	1170
12	18	1.85	77.4	22.615	100	4.402	13.48	6305.1	73	512	35	8.3	53	3	202	65	46	65	177	120	55.3	17	1170
12	18	1.85	77.4	22.615	100	4.402	13.48	3552.9	73	480	36	7.2	49	4	130	38	19	66	158	122	85.4	16	1170
12	18	1.85	77.4	22.615	100	4.402	13.48	5460.1	190	1056	73	7.8	128	11	242	67	89	65	158	120	75.4	15	1170
14	17	1.76	61.4	19.8218	100	4.298	13.64	5643.1	65	885	54	7	15	1	359	72	63	65	170	120	80.2	14	1350
14	17	1.76	61.4	19.8218	100	4.298	13.64	5839.1	42	620	58	6.8	0	0	602	47	58	58	167	107	56.2	16	1530
14	17	1.76	61.4	19.8218	100	4.298	13.64	6845.4	72	880	67	6.9	36	4	654	69	71	79	193	146	118.4	13	1080
14	17	1.76	61.4	19.8218	100	4.298	13.64	3481.2	36	266	37	7.3	26	1	158	19	14	74	192	137	90.3	14	900
14	17	1.76	61.4	19.8218	100	4.298	13.64	4690.8	2	389	58	5.9	0	0	94	36	25	72	187	133	72.9	15	1170
15	17	1.72	66.5	22.4784	80	1.185	16.59	6259.6	20	751	61	6.9	14	1	158	51	61	75	186	139	86.2	13	1350
15	17	1.72	66.5	22.4784	80	1.185	16.59	6535.7	162	829	63	7.5	106	9	304	63	67	75	186	139	86.2	15	1440
15	17	1.72	66.5	22.4784	80	1.185	16.59	4783.8	53	375	48	6.7	65	3	94	36	25	70	193	129	153.1	15	1350
15	17	1.72	66.5	22.4784	80	1.185	16.59	6391	82	567	63	7.9	46	4	163	43	22	72	164	134	122.4	15	990
17	18	1.81	78	23.8088	85	2.026	15.75	4544.9	85	598	47	6.3	0	0	185	46	43	80	191	148	151.8	12	990
17	18	1.81	78	23.8088	85	2.026	15.75	1684.1	0	74	18	5.5	0	0	112	15	5	71	184	132	60.3	15	990
5	13	1.77	66	21.07	100	5.021	13.82	2799.8	20	148	25	6.6	2	2	207	53	59	64	182	119	55.6	18	1260
10	13	1.57	45	18.26	90	2.732	15.02	2710.6	20	115	25	6.8	2	2	213	33	50	58	157	108	52.1	19	1170
12	13	1.7	47.6	16.47	100	4.402	13.48	6205.1	93	532	35	10.3	55	5	252	80	71	70	189	129	69.7	19	1080
14	13	1.75	62	20.24	100	4.298	13.64	3927.6	58	407	39	8.3	21	4	185	57	47	68	190	125	63.9	17	1620
15	13	1.73	63	21.05	80	1.185	16.59	5021.8	88	527	42	9.6	22	3	509	74	70	63	178	116	100.4	20	1350
17	13	1.58	44.9	17.99	85	2.026	15.75	4228.9	20	201	35	7.5	2	2	199	43	41	58	157	108	36.3	15	1170
5	18	1.77	76.2	24.32	100	5.021	13.82	3144.7	59	318	32	8.5	19	4	322	36	33	61	179	112	26.9	15	630
10	17	1.75	66.8	21.81	90	2.732	15.02	3294.2	34	276	30	7.9	5	2	102	50	30	63	171	116	54.9	15	1170
12	18	1.85	77.4	22.62	100	4.402	13.48	3632.9	103	510	36	9.2	54	6	150	53	39	58	162	108	20.1	13	1080
14	17	1.76	61.4	19.82	100	4.298	13.64	3561.2	66	296	37	9.3	31	3	178	34	34	70	180	129	55.5	14	1350
15	17	1.72	66.5	22.48	80	1.185	16.59	4863.8	83	405	48	8.7	70	5	114	51	45	59	158	109	37	13	1350
17	18	1.81	78	23.81	85	2.026	15.75	1764.1	30	104	18	7.5	5	2	132	30	25	70	180	130	64.2	12	990
4	17	1.79	73.5	22.9394	90	2.639	14.84	6428.6	123	801	54	6.6	62	4	241	46	56	72	190	133	67.3	16	630
4	17	1.79	73.5	22.9394	90	2.639	14.84	6893.5	304	1010	68	8.6	210	13	915	62	67	59	177	110	32.9	16	1260
4	17	1.79	73.5	22.9394	90	2.639	14.84	3951.3	80	470	35	6.9	62	3	242	45	34	77	195	143	73.7	16	1080
6	16	1.72	71.3	24.1009	100	3.696	12.97	6104.3	159	919	55	7.1	117	4	379	52	64	66	173	123	71.2	15	990
6	16	1.72	71.3	24.1009	100	3.696	12.97	5304.2	59	655	50	6.8	40	2	276	74	37	70	185	130	88.9	18	1170
6	16	1.72	71.3	24.1009	100	3.696	12.97	6461.1	83	683	54	7.4	46	4	229	54	59	83	195	154	119	15	1260
6	16	1.72	71.3	24.1009	100	0.548	15.64	2510.6	1	152	26	5.7	0	0	125	40	32	62	179	115	56.5	15	990
13	17	1.64	52.9	19.6684	80	0.985	16.52	7428.9	208	1322	70	7	151	11	571	83	81	74	177	136	124.2	16	900
13	17	1.64	52.9	19.6684	80	0.985	16.52	4661.7	44	526	49	6.6	0	0	288	49	39	79	190	146	108.5	20	1260
13	17	1.64	52.9	19.6684	80	0.985	16.52	6352.6	193	907	62	7.4	137	11	265	57	66	79	189	147	130.1	17	1260
13	17	1.64	52.9	19.6684	80	0.985	16.52	2976.4	58	302	27	7.2	42	3	135	27	8	82	195	152	138	14	1170
13	17	1.64	52.9	19.6684	80	0.985	16.52	5363.8	199	944	65	7.2	57	5	291	67	71	77	195	143	89.9	16	1350
4	14	1.85	73	21.33	90	2.639	14.84	4098.7	33	367	34	8.4	11	3	204	63	53	75	189	139	78.5	20	1440
6	13	1.63	54.4	20.47	100	3.696	12.97	4703.7	39	409	43	8	2	2	255	52	52	78	187	144	93.2	18	1260
13	13	1.7	67.7	23.43	80	0.985	16.52	4885.5	40	471	43	8.8	13	3	248	59	58	76	190	141	72.4	18	1350
4	17	1.79	73.5	22.94	90	2.639	14.84	4031.3	110	500	35	8.9	67	5	262	60	54	79	182	130	68.6	16	630
6	16	1.72	71.3	24.1	100	3.696	12.97	2590.6	31	182	26	7.7	5	2	145	55	52	64	175	119	67.4	15	990
13	17	1.64	52.9	19.67	80	0.985	16.52	3056.4	88	332	27	9.2	47	5	155	42	28	74	192	137	74.7	16	900
1	18	1.73	64.4	21.5176	80	0.937	16.35	5091.8	3	452	45	5.6	0	0	392	44	46	70	180	130	90.1	12	900
1	18	1.73	64.4	21.5176	80	0.937	16.35	5881.9	137	787	57	7.3	104	5	329	69	66	71	182	132	99.5	16	1170
1	18	1.73	64.4	21.5176	80	0.937	16.35	3101	1	247	30	5.8	0	0	166	34	10	66	176	122	65.4	14	1080
2	17	1.73	61.1	20.415	100	4.025	13.43	7118.9	145	1073	60	6.9	61	6	329	71	54	82	195	151	147.7	17	900
2	17	1.73	61.1	20.415	100	4.025	13.43	6429.5	2	295	81	10.8	0	0	220	75	67	81	192	149	117.8	18	1260
2	17	1.73	61.1	20.415	100	4.025	13.43	5648.1	56	568	55	6.8	36	3	258	47	30	75	188	139	105.9	16	1260
2	17	1.73	61.1	20.415	100	4.025	13.43	7547	137	947	73	7.4	95	7	443	76	59	77	194	142	103.7	17	1350
2	17	1.73	61.1	20.415	100	4.025	13.43	3101	1	247	30	5.8	0	0	166	34	10	81	196	150	132.9	12	1350
16	17	1.72	66.5	22.4784	90	2.458	14.82	6274.9	202	1207	59	7.3	107	9	321	108	109	65	181	120	69.9	13	1260
16	17	1.72	66.5	22.4784	90	2.458	14.82	5965.5	92	727	59	6.9	74	3	197	54	43	65	168	120	89.2	18	1350
16	17	1.72	66.5	22.4784	90	2.458	14.82	3424.4	6	142	33	5.7	0	0	113	10	9	75	185	139	101	15	1170
18	18	1.83	77.5	23.1419	85	1.876	15.63	4924.9	136	752	52	7.4	67	5	126	60	47	78	191	145	146	13	1260
18	18	1.83	77.5	23.1419	85	1.876	15.63	3706	17	227	41	7.1	11	1	112	19	7	79	190	146	163.3	15	1170
18	18	1.83	77.5	23.1419	85	1.876	15.63	7363	202	933	70	8.6	176	9	366	60	64	77	192	142	108.9	15	1350
18	18	1.83	77.5	23.1419	85	1.876	15.63	2371.3	10	191	25	5.9	0	0	139	19	9	68	180	125	87.1	13	990
18	18	1.83	77.5	23.1419	85	1.876	15.63	6757.1	44	824	55	7.3	14	2	305	80	68	71	178	131	83.6	16	1260
18	18	1.83	77.5	23.1419	85	1.876	15.63	5522.8	15	453	62	7	13	1	217	30	40	65	178	121	79.3	15	1080
1	13	1.55	40.3	16.77	80	0.937	16.35	5195.5	38	557	31	8.2	2	2	347	64	63	64	183	119	56.9	16	1080
2	13	1.67	54	19.36	100	4.025	13.43	3888.3	29	271	39	8.4	11	3	251	45	52	75	199	138	79.3	20	1080
16	14	1.67	42.5	15.24	90	2.458	14.82	5901.3	137	1044	49	8.7	52	6	374	121	126	73	191	135	102	17	1260
18	13	1.65	48.2	17.7	85	1.876	15.63	4369	36	349	40	9.2	15	3	173	67	42	69	195	127	73.8	20	1170
1	18	1.73	64.4	21.52	80	0.937	16.35	3181	31	277	30	7.8	5	2	186	49	30	79	196	147	94.6	12	900
2	17	1.73	61.1	20.41	100	4.025	13.43	3181	31	277	30	7.8	5	2	186	49	30	72	187	134	75.7	17	900
16	17	1.72	66.5	22.48	90	2.458	14.82	3504.4	36	172	33	7.7	5	2	133	25	29	69	189	128	53	13	1260
18	18	1.83	77.5	23.14	85	1.876	15.63	2451.3	40	221	25	7.9	5	2	159	34	29	62	175	115	33.2	13	1260
